# Supplementary material
Source: PubMed Central journal article supplement (PMC7825484)
Supplement: djz219_supplementary_data.pdf [file djz219_supplementary_data.pdf]

## SUPPLEMENTARY MATERIALS

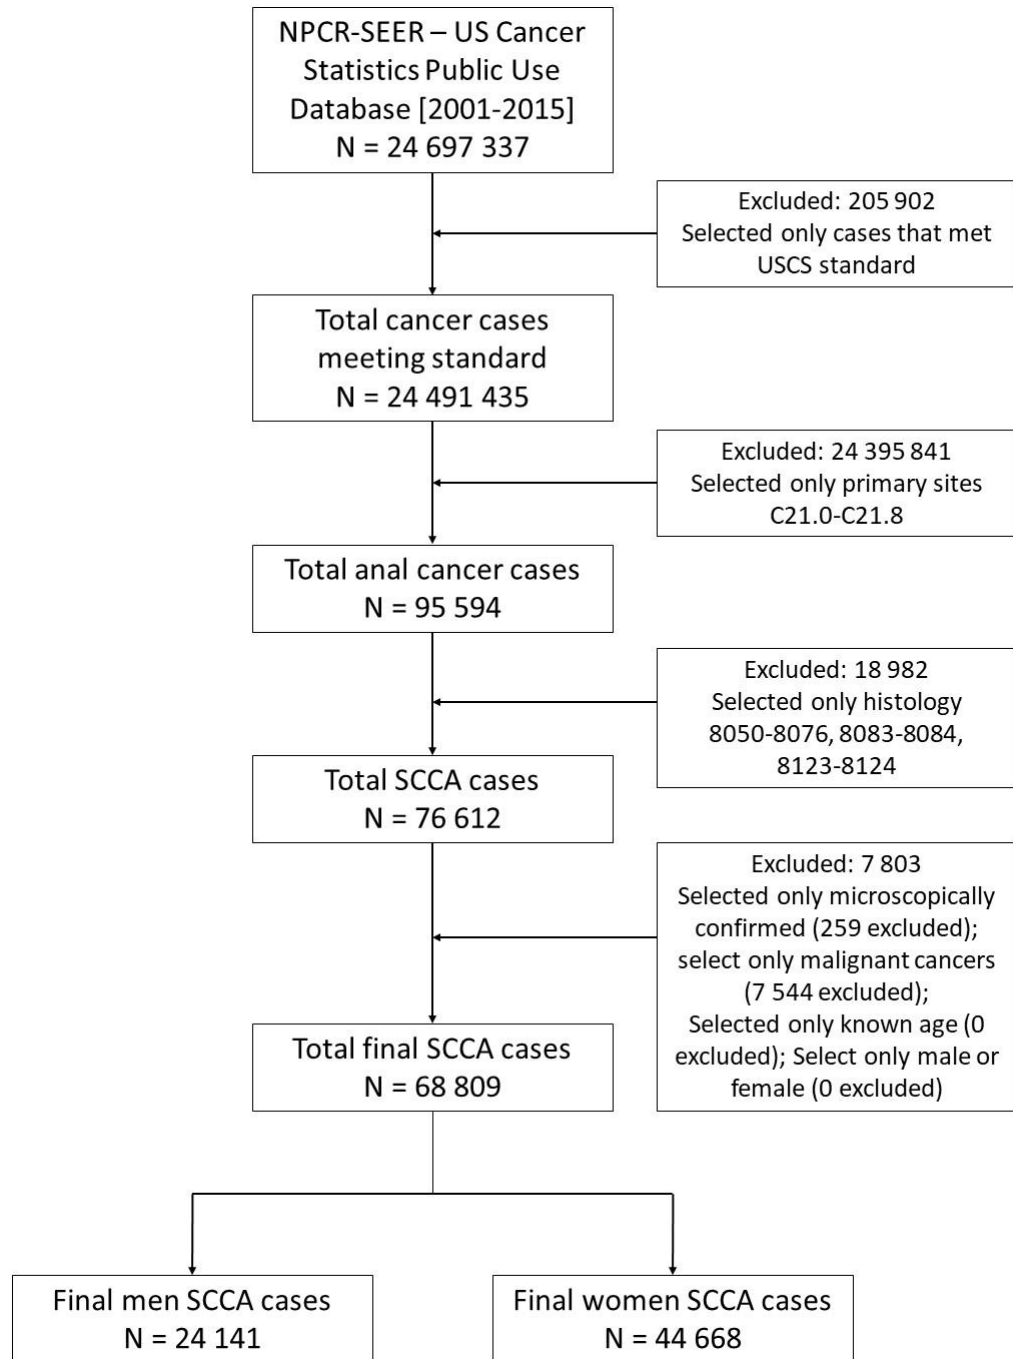

**Supplementary Figure 1. Diagram depicting the sample flow of the study population**

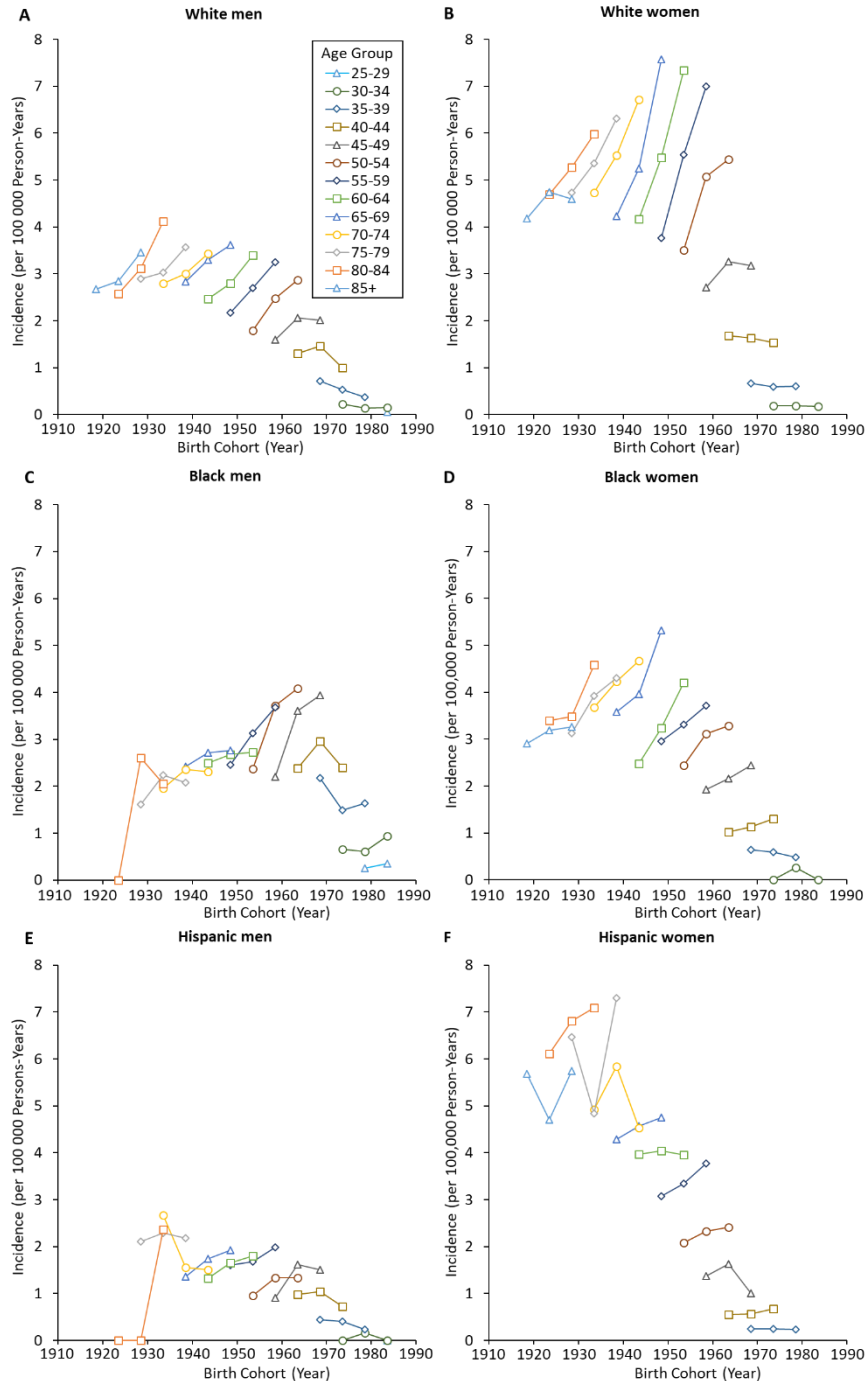

**Supplementary Figure 2. Age-specific incidence rates\* of squamous cell carcinoma of the anus by race and cohort year of birth: NPCR and SEER (2001-2015).** Age-specific incidence rates of squamous cell carcinoma of the anus based on cohort year of birth in 15-year birth cohorts between 1916 and 1990. Each point represents a different birth cohort and the lines connect birth cohorts of similar age. Panels A, B, C, D, E, and F show incidence rates among Non-Hispanic White men, Non-Hispanic White women, Non-Hispanic Black men, Non-Hispanic Black women, Hispanic men, and Hispanic women, respectively.  
 \* Rates were calculated as number of cases per 100 000 person-years and age adjusted to the 2000 US standard population

A. Non-Hispanic White Men

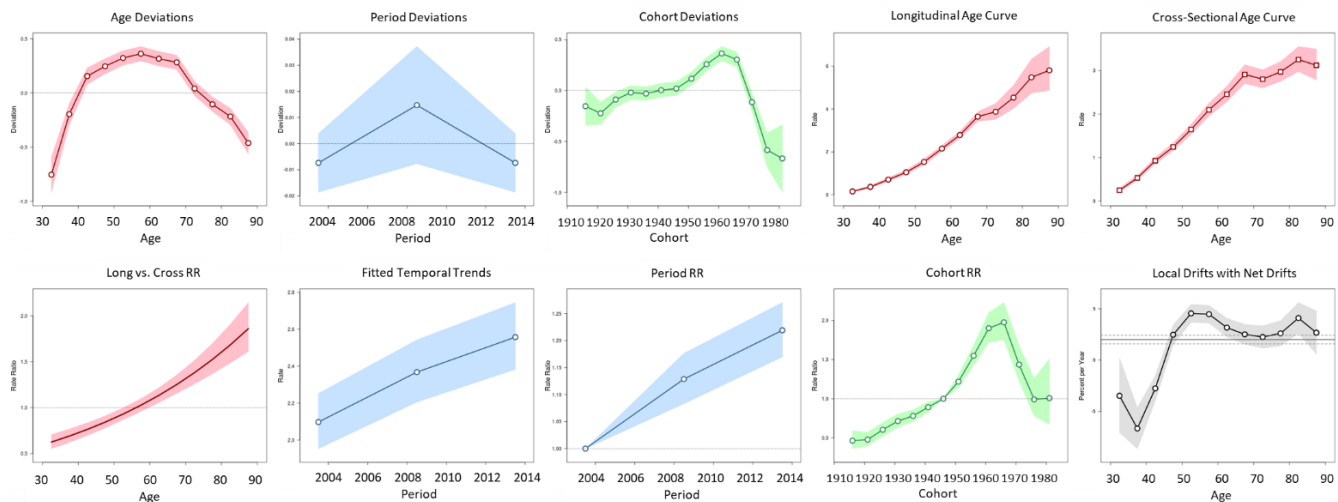

B. Non-Hispanic White Women

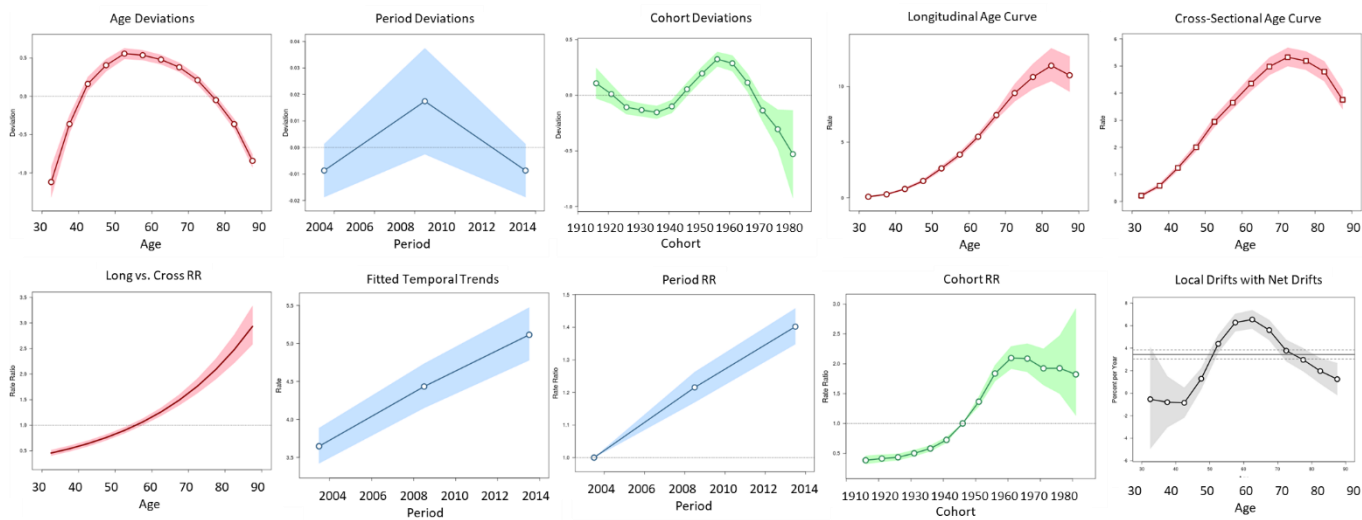

**Supplementary Figure 3.** Age-specific incidence rates of squamous cell carcinoma of the anus by race and cohort year of birth: NPCR and SEER (2001-2015).

C. Non-Hispanic Black Men

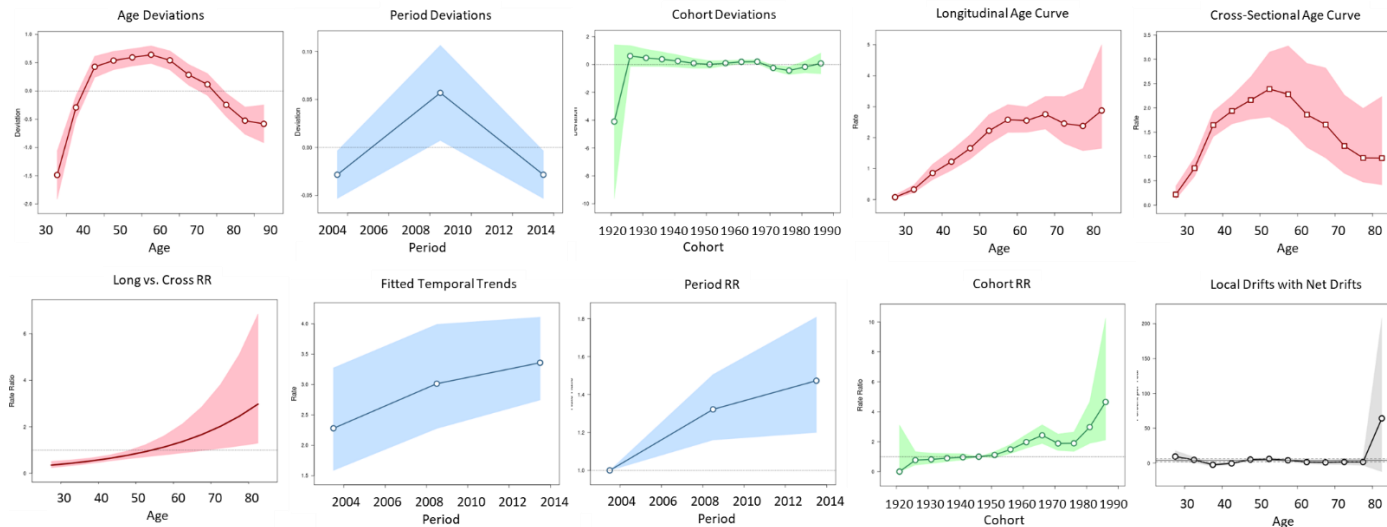

D. Non-Hispanic Black Women

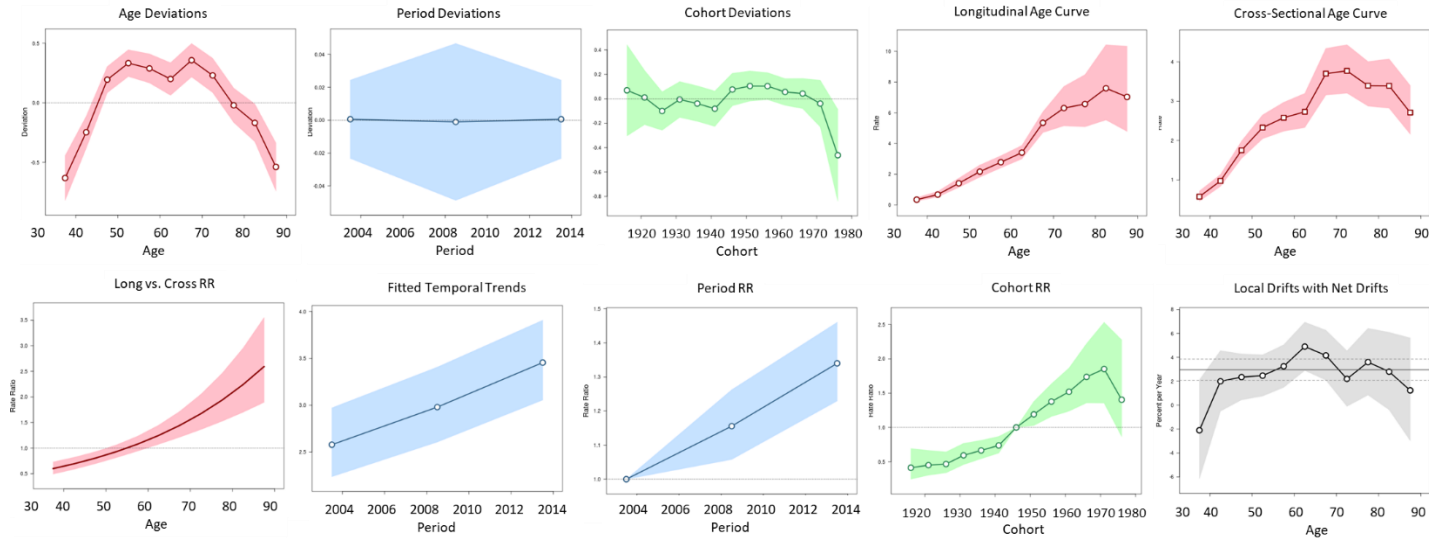

**Supplementary Figure 3 (continued).** Age-specific incidence rates of squamous cell carcinoma of the anus by race and cohort year of birth: NPCR and SEER (2001-2015).

D. Hispanic Men

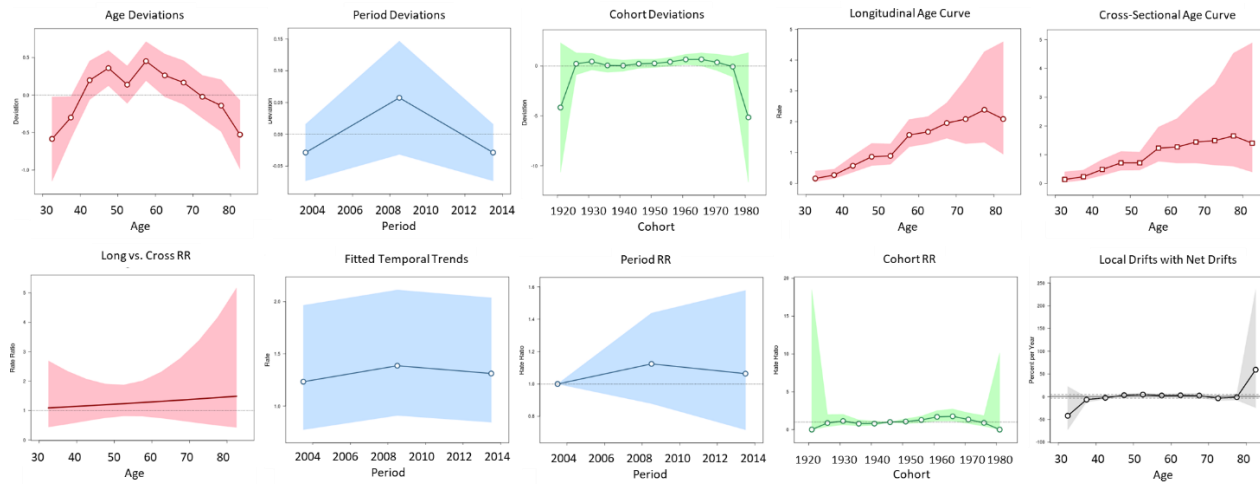

D. Hispanic Women

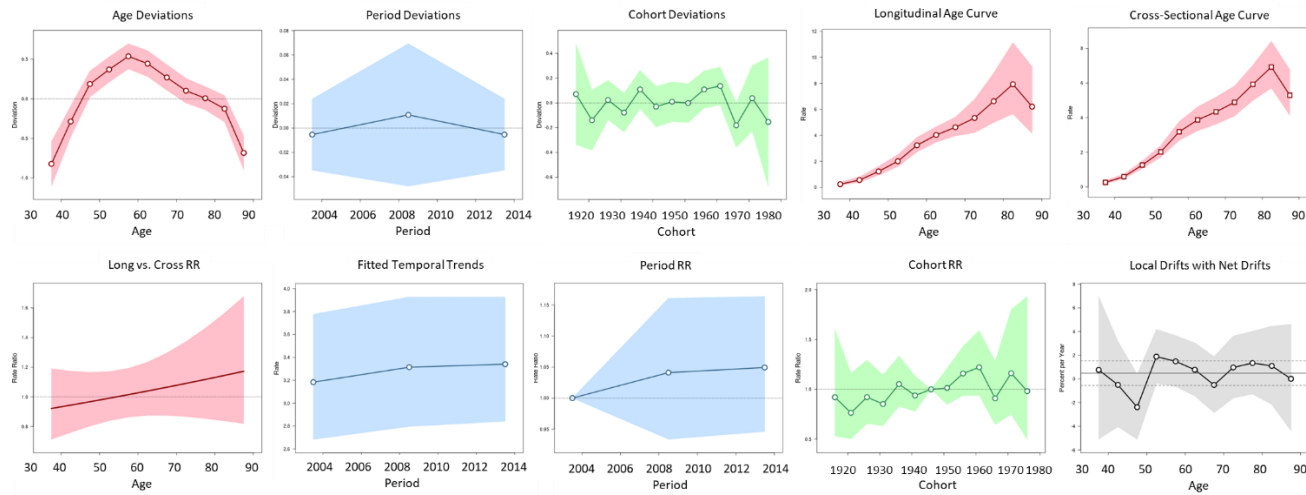

**Supplementary Figure 3 (continued).** Age-specific incidence rates of squamous cell carcinoma of the anus by race and cohort year of birth: NPCR and SEER (2001-2015)

**Supplementary Table 1. Rate Ratios for Squamous Cell Carcinoma of the Anus, Comparing Age at Cancer Diagnosis According to Race/Ethnicity among Men**

| Age                | 2001-2005              | 2006-2010              | 2011-2015              | Age               | 2001-2005              | 2006-2010              | 2011-2015              |
|--------------------|------------------------|------------------------|------------------------|-------------------|------------------------|------------------------|------------------------|
|                    | Rate Ratio<br>(95% CI) | Rate Ratio<br>(95% CI) | Rate Ratio<br>(95% CI) |                   | Rate Ratio<br>(95% CI) | Rate Ratio<br>(95% CI) | Rate Ratio<br>(95% CI) |
| Non-Hispanic White |                        |                        |                        |                   |                        |                        |                        |
| 30-34              | Ref                    | Ref                    | Ref                    |                   |                        |                        |                        |
| 35-39              | 3.09<br>(2.38-4.06)    | 3.66<br>(2.60-5.26)    | 2.39<br>(1.68-3.43)    | 35-39 vs<br>30-34 | 3.09<br>(2.38-4.06)    | 3.66<br>(2.60-5.26)    | 2.39<br>(1.68-3.43)    |
| 40-44              | 5.62<br>(4.40-7.27)    | 10.01<br>(7.30-14.06)  | 6.42<br>(4.73-8.88)    | 40-44 vs<br>35-39 | 1.82<br>(1.56-2.12)    | 2.73<br>(2.29-3.27)    | 2.69<br>(2.15-3.38)    |
| 45-49              | 6.92<br>(5.43-8.93)    | 14.15<br>(10.37-19.78) | 12.93<br>(9.64-17.70)  | 45-49 vs<br>40-44 | 1.23<br>(1.09-1.39)    | 1.41<br>(1.26-1.58)    | 2.01<br>(1.76-2.31)    |
| 50-54              | 7.74<br>(6.08-9.98)    | 16.93<br>(12.43-23.64) | 18.44<br>(13.81-25.16) | 50-54 vs<br>45-49 | 1.12<br>(1.01-1.25)    | 1.20<br>(1.09-1.32)    | 1.43<br>(1.30-1.57)    |
| 55-59              | 9.40<br>(7.38-12.13)   | 18.45<br>(13.54-25.77) | 20.86<br>(15.63-28.45) | 55-59 vs<br>50-54 | 1.22<br>(1.09-1.36)    | 1.09<br>(0.99-1.19)    | 1.13<br>(1.04-1.23)    |
| 60-64              | 10.65<br>(8.35-13.76)  | 19.13<br>(14.03-26.76) | 21.80<br>(16.33-29.75) | 60-64 vs<br>55-59 | 1.13<br>(1.01-1.27)    | 1.04<br>(0.94-1.14)    | 1.05<br>(0.96-1.13)    |
| 65-69              | 12.27<br>(9.60-15.88)  | 22.56<br>(16.52-31.58) | 23.17<br>(17.34-31.65) | 65-69 vs<br>60-64 | 1.15<br>(1.02-1.30)    | 1.18<br>(1.06-1.31)    | 1.06<br>(0.97-1.16)    |
| 70-74              | 12.11<br>(9.45-15.70)  | 20.58<br>(15.00-28.93) | 22.07<br>(16.45-30.24) | 70-74 vs<br>65-69 | 0.99<br>(0.87-1.12)    | 0.91<br>(0.81-1.03)    | 0.95<br>(0.86-1.05)    |
| 75-79              | 12.52<br>(9.74-16.29)  | 20.77<br>(15.09-29.27) | 22.92<br>(17.02-31.52) | 75-79 vs<br>70-74 | 1.03<br>(0.90-1.19)    | 1.01<br>(0.88-1.15)    | 1.04<br>(0.92-1.17)    |
| 80-84              | 11.17<br>(8.56-14.73)  | 21.35<br>(15.42-30.25) | 26.45<br>(19.57-36.47) | 80-84 vs<br>75-79 | 0.89<br>(0.75-1.05)    | 1.03<br>(0.88-1.20)    | 1.15<br>(1.01-1.32)    |
| 85 +               | 11.59<br>(8.73-15.50)  | 19.46<br>(13.90-27.82) | 22.21<br>(16.32-30.80) | 85+ vs<br>80-84   | 1.04<br>(0.84-1.28)    | 0.91<br>(0.76-1.09)    | 0.84<br>(0.72-0.98)    |
| Non-Hispanic Black |                        |                        |                        |                   |                        |                        |                        |

|          |                     |                       |                      |                   |                     |                     |                     |
|----------|---------------------|-----------------------|----------------------|-------------------|---------------------|---------------------|---------------------|
| 30-34    | Ref                 | Ref                   | Ref                  |                   |                     |                     |                     |
| 35-39    | 3.33<br>(2.31-4.88) | 2.47<br>(1.65-3.76)   | 1.74<br>(1.25-2.44)  | 35-39 vs<br>30-34 | 3.33<br>(2.31-4.88) | 2.47<br>(1.65-3.76) | 1.74<br>(1.25-2.44) |
| 40-44    | 3.65<br>(2.55-5.33) | 4.93<br>(3.42-7.29)   | 2.55<br>(1.88-3.50)  | 40-44 vs<br>35-39 | 1.10<br>(0.86-1.39) | 2.00<br>(1.54-2.60) | 1.46<br>(1.12-1.91) |
| 45-49    | 3.36<br>(2.33-4.95) | 5.99<br>(4.19-8.81)   | 4.21<br>(3.17-5.67)  | 45-49 vs<br>40-44 | 0.92<br>(0.72-1.17) | 1.22<br>(1.00-1.48) | 1.65<br>(1.34-2.04) |
| 50-54    | 3.63<br>(2.50-5.37) | 6.17<br>(4.30-9.10)   | 4.36<br>(3.29-5.87)  | 50-54 vs<br>45-49 | 1.08<br>(0.83-1.40) | 1.03<br>(0.85-1.25) | 1.04<br>(0.87-1.24) |
| 55-59    | 3.76<br>(2.54-5.64) | 5.20<br>(3.57-7.75)   | 3.93<br>(2.94-5.32)  | 55-59 vs<br>50-54 | 1.03<br>(0.77-1.38) | 0.84<br>(0.68-1.04) | 0.90<br>(0.75-1.09) |
| 60-64    | 3.82<br>(2.52-5.85) | 4.45<br>(2.98-6.80)   | 2.91<br>(2.12-4.03)  | 60-64 vs<br>55-59 | 1.02<br>(0.72-1.43) | 0.86<br>(0.65-1.13) | 0.74<br>(0.58-0.93) |
| 65-69    | 3.72<br>(2.39-5.82) | 4.50<br>(2.93-7.02)   | 2.94<br>(2.09-4.17)  | 65-69 vs<br>60-64 | 0.97<br>(0.65-1.44) | 1.01<br>(0.71-1.42) | 1.01<br>(0.75-1.36) |
| 70-74    | 2.99<br>(1.78-4.97) | 3.92<br>(2.42-6.37)   | 2.47<br>(1.64-3.69)  | 70-74 vs<br>65-69 | 0.81<br>(0.49-1.30) | 0.87<br>(0.57-1.32) | 0.84<br>(0.57-1.22) |
| 75-79    | 2.47<br>(1.31-4.46) | 3.71<br>(2.13-6..37)  | 2.22<br>(1.36-3.55)  | 75-79 vs<br>70-74 | 0.82<br>(0.42-1.55) | 0.95<br>(0.55-1.60) | 0.90<br>(0.54-1.48) |
| 80-84    | N/A                 | 4.33<br>(2.31-7.86)   | 2.19<br>(1.18-3.84)  | 80-84 vs<br>75-79 | N/A                 | 1.17<br>(0.60-2.23) | 0.98<br>(0.50-1.89) |
| 85 +     | N/A                 | N/A                   | N/A                  | 85+ vs<br>80-84   | N/A                 | N/A                 | N/A                 |
| Hispanic |                     |                       |                      |                   |                     |                     |                     |
| 30-34    | N/A                 | Ref                   | N/A                  |                   |                     |                     |                     |
| 35-39    | Ref                 | 2.59<br>(1.41-4.97)   | Ref                  | 35-39 vs<br>30-34 | N/A                 | 2.59<br>(1.41-4.97) | N/A                 |
| 40-44    | 2.21<br>(1.46-3.41) | 6.70<br>(3.90-12.23)  | 3.14<br>(1.95-5.23)  | 40-44 vs<br>35-39 | 2.21<br>(1.46-3.41) | 2.59<br>(1.75-3.89) | 3.14<br>(1.95-5.23) |
| 45-49    | 2.05<br>(1.31-3.25) | 10.40<br>(6.13-18.80) | 6.53<br>(4.19-10.56) | 45-49 vs<br>40-44 | 0.93<br>(0.63-1.36) | 1.55<br>(1.16-2.08) | 2.08<br>(1.54-2.83) |

|       |                      |                       |                       |                   |                     |                     |                     |
|-------|----------------------|-----------------------|-----------------------|-------------------|---------------------|---------------------|---------------------|
| 50-54 | 2.17<br>(1.34-3.51)  | 8.59<br>(4.95-15.80)  | 5.76<br>(3.65-9.44)   | 50-54 vs<br>45-49 | 1.06<br>(0.68-1.64) | 0.83<br>(0.61-1.12) | 0.88<br>(0.67-1.16) |
| 55-59 | 3.65<br>(2.32-5.80)  | 10.84<br>(6.22-20.02) | 8.56<br>(5.46-13.95)  | 55-59 vs<br>50-54 | 1.68<br>(1.08-2.64) | 1.26<br>(0.89-1.78) | 1.49<br>(1.11-1.98) |
| 60-64 | 3.01<br>(1.76-5.10)  | 10.67<br>(5.94-20.17) | 7.80<br>(4.84-12.97)  | 60-64 vs<br>55-59 | 0.82<br>(0.49-1.35) | 0.99<br>(0.66-1.45) | 0.91<br>(0.66-1.24) |
| 65-69 | 3.10<br>(1.72-5.45)  | 11.22<br>(6.03-21.78) | 8.30<br>(5.03-14.08)  | 65-69 vs<br>60-64 | 1.03<br>(0.55-1.89) | 1.05<br>(0.66-1.67) | 1.06<br>(0.73-1.55) |
| 70-74 | 6.07<br>(3.63-10.09) | 10.04<br>(5.04-20.46) | 6.51<br>(3.62-11.78)  | 70-74 vs<br>65-69 | 1.96<br>(1.09-3.59) | 0.89<br>(0.50-1.58) | 0.78<br>(0.47-1.27) |
| 75-79 | 4.77<br>(2.51-8.72)  | 14.78<br>(7.48-29.93) | 9.46<br>(5.25-17.12)  | 75-79 vs<br>70-74 | 0.79<br>(0.41-1.47) | 1.47<br>(0.89-2.77) | 1.45<br>(0.82-2.57) |
| 80-84 | N/A                  | N/A                   | 10.22<br>(5.29-19.46) | 80-84 vs<br>75-79 | N/A                 | N/A                 | 1.08<br>(0.57-2.02) |
| 85 +  | N/A                  | N/A                   | N/A                   | 85+ vs<br>80-84   | N/A                 | N/A                 | N/A                 |

N/A Statistic not displayed due to fewer than 16 cases.



**Supplementary Table 2. Rate Ratios for Squamous Cell Carcinoma of the Anus, Comparing Age at Cancer Diagnosis According to Race/Ethnicity among Women.**

| Age                | 2001-2005              | 2006-2010              | 2011-2015              | Age               | 2001-2005              | 2006-2010              | 2011-2015              |
|--------------------|------------------------|------------------------|------------------------|-------------------|------------------------|------------------------|------------------------|
|                    | Rate Ratio<br>(95% CI) | Rate Ratio<br>(95% CI) | Rate Ratio<br>(95% CI) |                   | Rate Ratio<br>(95% CI) | Rate Ratio<br>(95% CI) | Rate Ratio<br>(95% CI) |
| Non-Hispanic White |                        |                        |                        |                   |                        |                        |                        |
| 30-34              | Ref                    | Ref                    | Ref                    |                   |                        |                        |                        |
| 35-39              | 3.53<br>(2.65-4.77)    | 3.09<br>(2.27-4.27)    | 3.38<br>(2.48-4.68)    | 35-39 vs<br>30-34 | 3.53<br>(2.65-4.77)    | 3.09<br>(2.27-4.27)    | 3.38<br>(2.48-4.68)    |
| 40-44              | 8.84<br>(6.78-11.72)   | 8.56<br>(6.47-11.53)   | 8.63<br>(6.51-11.66)   | 40-44 vs<br>35-39 | 2.51<br>(2.16-2.92)    | 2.77<br>(2.34-3.28)    | 2.55<br>(2.14-3.06)    |
| 45-49              | 14.25<br>(10.99-18.81) | 17.10<br>(13.02-22.89) | 17.80<br>(13.54-23.85) | 45-49 vs<br>40-44 | 1.61<br>(1.46-1.78)    | 2.00<br>(1.81-2.21)    | 2.06<br>(1.85-2.30)    |
| 50-54              | 18.43<br>(14.22-24.29) | 26.54<br>(20.25-35.45) | 30.53<br>(23.31-40.77) | 50-54 vs<br>45-49 | 1.29<br>(1.19-1.40)    | 1.55<br>(1.45-1.67)    | 1.71<br>(1.59-1.85)    |
| 55-59              | 19.80<br>(15.27-26.11) | 28.98<br>(22.12-38.72) | 39.24<br>(29.98-52.37) | 55-59 vs<br>50-54 | 1.07<br>(0.99-1.16)    | 1.09<br>(1.03-1.16)    | 1.29<br>(1.21-1.36)    |
| 60-64              | 21.97<br>(16.93-29.00) | 28.63<br>(21.83-38.28) | 41.22<br>(31.49-55.02) | 60-64 vs<br>55-59 | 1.11<br>(1.02-1.21)    | 0.99<br>(0.92-1.05)    | 1.05<br>(0.99-1.11)    |
| 65-69              | 22.27<br>(17.13-27.43) | 27.47<br>(20.91-36.78) | 42.46<br>(32.42-56.70) | 65-69 vs<br>60-64 | 1.01<br>(0.92-1.11)    | 0.96<br>(0.89-1.03)    | 1.03<br>(0.97-1.09)    |
| 70-74              | 24.90<br>(19.17-32.90) | 28.89<br>(21.97-38.72) | 37.68<br>(28.72-50.40) | 70-74 vs<br>65-69 | 1.12<br>(1.02-1.23)    | 1.05<br>(0.97-1.14)    | 0.89<br>(0.83-0.95)    |
| 75-79              | 24.91<br>(19.16-32.94) | 28.00<br>(21.27-37.57) | 35.44<br>(26.96-47.50) | 75-79 vs<br>70-74 | 1.00<br>(0.91-1.10)    | 0.97<br>(0.89-1.06)    | 0.94<br>(0.87-1.02)    |
| 80-84              | 24.71<br>(18.96-32.75) | 27.60<br>(20.93-37.08) | 33.56<br>(25.46-45.07) | 80-84 vs<br>75-79 | 0.99<br>(0.90-1.10)    | 0.99<br>(0.89-1.09)    | 0.95<br>(0.86-1.04)    |
| 85 +               | 21.99<br>(16.83-29.19) | 24.80<br>(18.79-33.34) | 25.81<br>(19.57-34.69) | 85+ vs<br>80-84   | 0.89<br>(0.79-0.99)    | 0.90<br>(0.81-0.99)    | 0.77<br>(0.70-0.85)    |
| Non-Hispanic Black |                        |                        |                        |                   |                        |                        |                        |

|          |                       |                       |                        |                   |                     |                     |                     |
|----------|-----------------------|-----------------------|------------------------|-------------------|---------------------|---------------------|---------------------|
| 35-39    | Ref                   | Ref                   | Ref                    |                   |                     |                     |                     |
| 40-44    | 1.59<br>(1.08-2.35)   | 1.94<br>(1.31-2.91)   | 2.69<br>(1.78-4.17)    | 40-44 vs<br>35-39 | 1.59<br>(1.08-2.35) | 1.94<br>(1.31-2.91) | 2.69<br>(1.78-4.17) |
| 45-49    | 3.00<br>(2.12-4.31)   | 3.69<br>(2.59-5.37)   | 5.05<br>(3.45-7.62)    | 45-49 vs<br>40-44 | 1.89<br>(1.41-2.55) | 1.90<br>(1.45-2.53) | 1.88<br>(1.44-2.45) |
| 50-54    | 3.81<br>(2.70-5.46)   | 5.31<br>(3.77-7.65)   | 6.80<br>(4.69-10.17)   | 50-54 vs<br>45-49 | 1.27<br>(0.99-1.63) | 1.44<br>(1.16-1.78) | 1.35<br>(1.10-1.65) |
| 55-59    | 4.60<br>(3.25-6.63)   | 5.65<br>(3.99-8.17)   | 7.69<br>(5.30-11.49)   | 55-59 vs<br>50-54 | 1.21<br>(0.94-1.55) | 1.06<br>(0.87-1.31) | 1.13<br>(0.94-1.36) |
| 60-64    | 3.86<br>(2.65-5.70)   | 5.53<br>(3.85-8.09)   | 8.70<br>(5.98-13.03)   | 60-64 vs<br>55-59 | 0.84<br>(0.63-1.12) | 0.98<br>(0.78-1.23) | 1.13<br>(0.94-1.36) |
| 65-69    | 5.57<br>(3.87-8.14)   | 6.75<br>(4.68-9.92)   | 11.02<br>(7.56-16.54)  | 65-69 vs<br>60-64 | 1.44<br>(1.06-1.97) | 1.22<br>(0.94-1.58) | 1.27<br>(1.04-1.54) |
| 70-74    | 5.73<br>(3.93-8.45)   | 7.21<br>(4.95-10.69)  | 9.69<br>(6.53-14.76)   | 70-74 vs<br>65-69 | 1.03<br>(0.75-1.40) | 1.07<br>(0.81-1.41) | 0.88<br>(0.70-1.10) |
| 75-79    | 4.87<br>(3.23-7.40)   | 6.69<br>(4.48-10.11)  | 8.90<br>(5.89-13.81)   | 75-79 vs<br>70-74 | 0.85<br>(0.59-1.21) | 0.93<br>(0.67-1.27) | 0.92<br>(0.69-1.22) |
| 80-84    | 5.30<br>(3.38-8.27)   | 5.95<br>(3.81-9.32)   | 9.51<br>(6.13-15.00)   | 80-84 vs<br>75-79 | 1.09<br>(0.71-1.66) | 0.89<br>(0.60-1.31) | 1.07<br>(0.76-1.49) |
| 85 +     | 4.52<br>(2.78-7.28)   | 5.44<br>(3.42-8.65)   | 6.76<br>(4.24-10.91)   | 85+ vs 80-84      | 0.85<br>(0.52-1.39) | 0.91<br>(0.58-1.43) | 0.71<br>(0.48-1.05) |
| Hispanic |                       |                       |                        |                   |                     |                     |                     |
| 35-39    | Ref                   | Ref                   | Ref                    |                   |                     |                     |                     |
| 40-44    | 2.21<br>(1.24-4.06)   | 2.30<br>(1.35-4.01)   | 2.89<br>(1.77-4.89)    | 40-44 vs<br>35-39 | 2.21<br>(1.24-4.06) | 2.30<br>(1.35-4.01) | 2.89<br>(1.77-4.89) |
| 45-49    | 5.47<br>(3.27-9.59)   | 6.64<br>(4.18-11.01)  | 4.34<br>(2.70-7.22)    | 45-49 vs<br>40-44 | 2.48<br>(1.65-3.78) | 2.89<br>(2.03-4.18) | 1.50<br>(1.07-2.12) |
| 50-54    | 8.28<br>(5.00-14.40)  | 9.46<br>(5.99-15.62)  | 10.33<br>(6.66-16.75)  | 50-54 vs<br>45-49 | 1.51<br>(1.10-2.09) | 1.43<br>(1.10-1.85) | 2.38<br>(1.82-3.14) |
| 55-59    | 12.24<br>(7.43-21.19) | 13.60<br>(8.65-22.37) | 16.18<br>(10.50-26.09) | 55-59 vs<br>50-54 | 1.48<br>(1.10-1.99) | 1.44<br>(1.13-1.83) | 1.57<br>(1.27-1.93) |

|       |                        |                        |                        |                   |                     |                     |                     |
|-------|------------------------|------------------------|------------------------|-------------------|---------------------|---------------------|---------------------|
| 60-64 | 15.75<br>(9.54-27.33)  | 16.44<br>(01.41-27.13) | 16.99<br>(10.95-27.52) | 60-64 vs<br>55-59 | 1.29<br>(0.96-1.73) | 1.21<br>(0.95-1.54) | 1.05<br>(0.85-1.29) |
| 65-69 | 17.06<br>(10.25-29.78) | 18.59<br>(11.67-30.89) | 20.37<br>(13.08-33.10) | 65-69 vs<br>60-64 | 1.08<br>(0.79-1.47) | 1.13<br>(0.87-1.47) | 1.20<br>(0.96-1.50) |
| 70-74 | 19.56<br>(11.70-34.27) | 23.77<br>(14.92-39.51) | 19.46<br>(12.30-32.04) | 70-74 vs<br>65-69 | 1.15<br>(0.83-1.59) | 1.28<br>(0.97-1.69) | 0.96<br>(0.74-1.23) |
| 75-79 | 25.68<br>(15.35-45.04) | 19.70<br>(12.03-33.46) | 31.33<br>(19.96-51.24) | 75-79 vs<br>70-74 | 1.31<br>(0.94-1.84) | 0.83<br>(0.60-1.13) | 1.61<br>(1.23-2.11) |
| 80-84 | 24.28<br>(13.89-44.04) | 27.71<br>(16.88-47.17) | 30.44<br>(19.03-50.55) | 80-84 vs<br>75-79 | 0.95<br>(0.64-1.39) | 1.41<br>(0.99-2.00) | 0.97<br>(0.73-1.29) |
| 85 +  | 22.56<br>(12.46-41.99) | 19.15<br>(11.01-34.08) | 24.63<br>(15.12-41.49) | 85+ vs<br>80-84   | 0.93<br>(0.57-1.49) | 0.69<br>(0.45-1.05) | 0.81<br>(0.58-1.13) |

N/A Statistic not displayed due to fewer than 16 cases.

**Supplementary Table 3. Trends in Anal Squamous Cell Carcinoma Incidence Rates\* During 2001-2015**

| Characteristic          | Trend†    |                        |                 |           |                        |                 |                        |                 |
|-------------------------|-----------|------------------------|-----------------|-----------|------------------------|-----------------|------------------------|-----------------|
|                         | 1         |                        |                 | 2         |                        |                 | Overall (2001-2015)    |                 |
|                         | Year      | APC (95% CI)           | <i>P</i> Value‡ | Year      | APC (95% CI)           | <i>P</i> Value‡ | AAPC (95% CI)          | <i>P</i> Value‡ |
| Overall                 | 2001-2009 | 3.85 (2.95 to 4.76)    | <0.001          | 2009-2015 | 1.22 (0.08 to 2.37)    | 0.04            | 2.71 (2.09 to 3.34)    | <0.001          |
| Races                   |           |                        |                 |           |                        |                 |                        |                 |
| NHW                     | 2001-2009 | 4.17 (3.17 to 5.17)    | <0.001          | 2009-2015 | 1.81 (0.54 to 3.10)    | 0.01            | 3.15 (2.45 to 3.85)    | <0.001          |
| NHB                     | 2001-2015 | 2.66 (1.77 to 3.57)    | <0.001          |           |                        |                 | 2.66 (1.77 to 3.57)    | <0.001          |
| Hispanic                | 2001-2015 | 0.42 (-0.49 to 1.33)   | 0.34            |           |                        |                 | 0.42 (-0.49 to 1.33)   | 0.34            |
| Other§                  | 2001-2015 | -0.12 (-2.11 to 1.92)  | 0.90            |           |                        |                 | -0.12 (-2.11 to 1.92)  | 0.90            |
| Age at diagnosis, y     |           |                        |                 |           |                        |                 |                        |                 |
| <40                     | 2001-2015 | -2.17 (-3.61 to -0.72) | 0.007           |           |                        |                 | -2.17 (-3.61 to -0.72) | 0.007           |
| 40-49                   | 2001-2009 | 3.70 (2.25 to 5.17)    | <0.001          | 2009-2015 | -4.45 (-6.54 to -2.31) | 0.001           | 0.13 (-0.97 to 1.23)   | 0.82            |
| 50-59                   | 2001-2009 | 6.85 (5.22 to 8.51)    | <0.001          | 2009-2015 | 1.40 (-0.45 to 3.28)   | 0.12            | 4.48 (3.40 to 5.57)    | <0.001          |
| 60-69                   | 2001-2015 | 4.44 (3.92 to 4.96)    | <0.001          |           |                        |                 | 4.44 (3.92 to 4.96)    | <0.001          |
| ≥70                     | 2001-2015 | 2.34 (1.94 to 2.74)    | <0.001          |           |                        |                 | 2.34 (1.94 to 2.74)    | <0.001          |
| SEER Summary Stage 2000 |           |                        |                 |           |                        |                 |                        |                 |
| Localized               | 2001-2015 | 1.88 (1.41 to 2.36)    | <0.001          |           |                        |                 | 1.88 (1.41 to 2.36)    | <0.001          |
| Regional                | 2001-2007 | 7.98 (4.86 to 11.21)   | <0.001          | 2007-2015 | 1.94 (0.47 to 3.43)    | 0.02            | 4.49 (3.11 to 5.88)    | <0.001          |
| Distant                 | 2001-2005 | 14.73 (6.93 to 23.09)  | 0.001           | 2005-2015 | 4.83 (3.56 to 6.11)    | <0.001          | 7.57 (5.51 to 9.66)    | <0.001          |
| Unknown                 | 2001-2013 | -0.45 (-1.20 to 0.32)  | 0.22            | 2013-2015 | -9.09 (-20.27 to 3.67) | 0.14            | -1.73 (-3.43 to 0.00)  | 0.05            |

Abbreviations: APC, annual percentage change; AAPC, average annual percentage change;

\* Rates were calculated as number of cases per 100 000 person-years and age adjusted to the 2000 US standard population.

† The calendar period of each segment was defined based on the identification of calendar years when a statistically significant change in the APC occurred (ie, the joinpoint).

‡ Statistical significance was determined when the APCs and AAPCs are significantly different from zero at the  $\alpha=0.05$  level

§ Others include Asian/Pacific Islander, American Indian/Alaskan Native, and other.

**Supplementary Table 4. Trends in Anal Squamous Cell Carcinoma Incidence Rates\* During 2001-2015 among Men**

| Characteristic          | Trend†    |                           |          |           |                           |          |           |                        |          |                           |          |
|-------------------------|-----------|---------------------------|----------|-----------|---------------------------|----------|-----------|------------------------|----------|---------------------------|----------|
|                         | 1         |                           |          | 2         |                           |          | 3         |                        |          | Overall (2001-2015)       |          |
|                         | Year      | APC (95% CI)              | P Value‡ | Year      | APC (95% CI)              | P Value‡ | Year      | APC (95% CI)           | P Value‡ | AAPC (95% CI)             | P Value‡ |
| Men (Overall)           | 2001-2009 | 3.65<br>(2.14 to 5.19)    | <0.001   | 2009-2015 | 0.27<br>(-1.67 to 2.25)   | 0.76     |           |                        |          | 2.19<br>(1.13 to 3.26)    | <0.001   |
| Race/Ethnicity          |           |                           |          |           |                           |          |           |                        |          |                           |          |
| NHW                     | 2001-2015 | 2.33<br>(1.65 to 3.01)    | <0.001   |           |                           |          |           |                        |          | 2.33<br>(1.65 to 3.01)    | <0.001   |
| NHB                     | 2001-2015 | 2.82<br>(1.32 to 4.35)    | 0.001    |           |                           |          |           |                        |          | 2.82<br>(1.32 to 4.35)    | 0.001    |
| Hispanic                | 2001-2015 | 0.64<br>(-0.82 to 2.12)   | 0.36     |           |                           |          |           |                        |          | 0.64<br>(-0.82 to 2.12)   | 0.36     |
| Other§                  | 2002-2015 | -1.50<br>(-3.78 to 0.83)  | 0.18     |           |                           |          |           |                        |          | -1.50<br>(-3.78 to 0.83)  | 0.18     |
| Age at diagnosis, y     |           |                           |          |           |                           |          |           |                        |          |                           |          |
| <40                     | 2001-2015 | -2.86<br>(-4.44 to -1.25) | 0.002    |           |                           |          |           |                        |          | -2.86<br>(-4.44 to -1.25) | 0.002    |
| 40-49                   | 2001-2009 | 5.47<br>(3.47 to 7.51)    | <0.001   | 2009-2015 | -8.77<br>(-3.19 to -4.66) | <0.001   |           |                        |          | 0.38<br>(-1.09 to 1.88)   | 0.61     |
| 50-59                   | 2001-2015 | 4.20<br>(3.16 to 5.24)    | <0.001   |           |                           |          |           |                        |          | 4.20<br>(3.16 to 5.24)    | <0.001   |
| 60-69                   | 2001-2015 |                           |          |           |                           |          |           |                        |          | 2.68<br>(1.70 to 3.67)    | <0.001   |
| ≥70                     | 2001-2004 | 11.68<br>(1.01 to 23.47)  | 0.04     | 2004-2008 | -1.80<br>(-10.16 to 7.33) | 0.64     | 2008-2015 | 3.85<br>(1.65 to 6.09) | 0.004    | 3.81<br>(0.84 to 6.86)    | 0.01     |
| SEER Summary Stage 2000 |           |                           |          |           |                           |          |           |                        |          |                           |          |
| Localized               | 2001-2015 | 1.30<br>(0.63 to 1.98)    | 0.001    |           |                           |          |           |                        |          | 1.30<br>(0.63 to 1.98)    | 0.001    |
| Regional                | 2001-2005 | 12.09 (2.32 to 22.79)     | 0.02     | 2005-2015 | 1.84<br>(0.09 to 3.63)    | 0.04     |           |                        |          | 4.67<br>(2.05 to 7.36)    | <0.001   |

|         |           |                           |      |           |                        |        |  |  |  |                           |        |
|---------|-----------|---------------------------|------|-----------|------------------------|--------|--|--|--|---------------------------|--------|
| Distant | 2001-2004 | 22.13<br>(4.60 to 42.60)  | 0.02 | 2004-2015 | 5.23<br>(3.78 to 6.69) | <0.001 |  |  |  | 8.64<br>(5.35 to 12.03)   | <0.001 |
| Unknown | 2001-2015 | -1.20<br>(-2.18 to -0.21) | 0.02 |           |                        |        |  |  |  | -1.20<br>(-2.18 to -0.21) | 0.02   |

Abbreviations: APC, annual percentage change; AAPC, average annual percentage change;

\* Rates were calculated as number of cases per 100 000 person-years and age adjusted to the 2000 US standard population.

† The calendar period of each segment was defined based on the identification of calendar years when a statistically significant change in the APC occurred (ie, the joinpoint).

‡ Statistical significance was determined when the APCs and AAPCs are significantly different from zero at the  $\alpha=0.05$  level

§ Others include Asian/Pacific Islander, American Indian/Alaskan Native, and other.

|| The overall time period is 2002-2015 for other men.

**Supplementary Table 5. Trends in Anal Squamous Cell Carcinoma Incidence Rates\* During 2001-2015 among Women**

| Characteristic          | Trend†    |                       |          |           |                        |          |                       |          |
|-------------------------|-----------|-----------------------|----------|-----------|------------------------|----------|-----------------------|----------|
|                         | 1         |                       |          | 2         |                        |          | Overall (2001-2015)   |          |
|                         | Year      | APC (95% CI)          | P Value‡ | Year      | APC (95% CI)           | P Value‡ | AAPC (95% CI)         | P Value‡ |
| Women (Overall)         | 2001-2009 | 4.08 (3.30 to 4.88)   | <0.001   | 2009-2015 | 1.83 (0.84 to 2.83)    | 0.002    | 3.11 (2.57 to 3.66)   | <0.001   |
| Races                   |           |                       |          |           |                        |          |                       |          |
| NHW                     | 2001-2009 | 4.65 (3.73 to 5.57)   | <0.001   | 2009-2015 | 2.44 (1.29 to 3.61)    | 0.001    | 3.70 (3.06 to 4.34)   | <0.001   |
| NHB                     | 2001-2015 | 2.57 (1.67 to 3.49)   | <0.001   |           |                        |          | 2.57 (1.67 to 3.49)   | <0.001   |
| Hispanic                | 2001-2015 | 0.42 (-0.42 to 1.27)  | 0.30     |           |                        |          | 0.42 (-0.42 to 1.27)  | 0.30     |
| Other§                  | 2002-2015 | -0.23 (-2.49 to 2.09) | 0.84     |           |                        |          | -0.23 (-2.49 to 2.09) | 0.84     |
| Age at diagnosis, y     |           |                       |          |           |                        |          |                       |          |
| <40                     | 2001-2015 | -1.30 (-3.16 to 0.59) | 0.16     |           |                        |          | -1.30 (-3.16 to 0.59) | 0.16     |
| 40-49                   | 2001-2009 | 2.29 (0.37 to 4.25)   | 0.02     | 2009-2015 | -3.08 (-5.96 to -0.12) | 0.04     | -0.05 (-1.52 to 1.45) | 0.95     |
| 50-59                   | 2001-2007 | 8.85 (6.23 to 11.53)  | <0.001   | 2007-2015 | 2.17 (0.99 to 3.38)    | 0.002    | 4.98 (3.84 to 6.13)   | <0.001   |
| 60-69                   | 2001-2015 | 5.34 (4.78 to 5.90)   | <0.001   |           |                        |          | 5.34 (4.78 to 5.90)   | <0.001   |
| ≥70                     | 2001-2015 | 2.45 (1.96 to 2.92)   | <0.001   |           |                        |          | 2.45 (1.96 to 2.92)   | <0.001   |
| SEER Summary Stage 2000 |           |                       |          |           |                        |          |                       |          |
| Localized               | 2001-2015 | 2.29 (1.81 to 2.78)   | <0.001   |           |                        |          | 2.29 (1.81 to 2.78)   | <0.001   |
| Regional                | 2001-2008 | 7.40 (5.34 to 9.51)   | <0.001   | 2008-2015 | 2.00 (0.49 to 3.53)    | 0.01     | 4.67 (3.55 to 5.80)   | <0.001   |
| Distant                 | 2001-2005 | 14.32 (4.34 to 25.27) | 0.009    | 2005-2015 | 4.89 (3.23 to 6.57)    | <0.001   | 7.50 (4.84 to 10.23)  | <0.001   |
| Unknown                 | 2001-2009 | 0.86 (-1.10 to 2.86)  | 0.36     | 2009-2015 | -3.46 (-6.31 to -0.52) |          | -1.02 (-2.49 to 0.48) | 0.18     |

Abbreviations: APC, annual percentage change; AAPC, average annual percentage change;

\* Rates were calculated as number of cases per 100 000 person-years and age adjusted to the 2000 US standard population.

† The calendar period of each segment was defined based on the identification of calendar years when a statistically significant change in the APC occurred (ie, the joinpoint).

‡ Statistical significance was determined when the APCs and AAPCs are significantly different from zero at the  $\alpha=0.05$  level

§ Others include Asian/Pacific Islander, American Indian/Alaskan Native, and other.

**Supplementary Table 6. Trends in Observed Anal Cancer Mortality Rate\* During 2001-2016 in the United States**

| Characteristic  | Trend†    |                       |          |           |                       |          |                       |          |
|-----------------|-----------|-----------------------|----------|-----------|-----------------------|----------|-----------------------|----------|
|                 | 1         |                       |          | 2         |                       |          | Overall (2001-2016)   |          |
|                 | Year      | APC (95% CI)          | P Value‡ | Year      | APC (95% CI)          | P Value‡ | AAPC (95% CI)         | P Value‡ |
| Overall         | 2001-2016 | 3.07 (2.59 to 3.55)   | <0.001   |           |                       |          | 3.07 (2.59 to 3.55)   | <0.001   |
| Sex             |           |                       |          |           |                       |          |                       |          |
| Men             | 2001-2016 | 3.44 (2.63 to 4.27)   | <0.001   |           |                       |          | 3.44 (2.63 to 4.27)   | <0.001   |
| Women           | 2001-2016 | 2.94 (2.28 to 3.60)   | <0.001   |           |                       |          | 2.94 (2.28 to 3.60)   | <0.001   |
| Race/Ethnicity  |           |                       |          |           |                       |          |                       |          |
| NHW             | 2001-2016 | 3.32 (2.79 to 3.85)   | <0.001   |           |                       |          | 3.32 (2.79 to 3.85)   | <0.001   |
| NHB             | 2001-2016 | 3.17 (2.10 to 4.25)   | <0.001   |           |                       |          | 3.17 (2.10 to 4.25)   | <0.001   |
| Hispanic        | 2001-2016 | 2.45 (0.58 to 4.35)   | 0.01     |           |                       |          | 2.45 (0.58 to 4.35)   | 0.01     |
| Others§         | 2001-2016 | -0.15 (-5.17 to 5.14) | 0.95     |           |                       |          | -0.15 (-5.17 to 5.14) | 0.95     |
| Age at death, y |           |                       |          |           |                       |          |                       |          |
| <40             | 2001-2016 | -0.79 (-3.49 to 1.98) | 0.55     |           |                       |          | -0.79 (-3.49 to 1.98) | 0.55     |
| 40-49           | 2001-2009 | 5.39 (1.61 to 9.31)   | 0.009    | 2009-2015 | -2.40 (-6.49 to 1.87) | 0.24     | 1.68 (-0.81 to 4.24)  | 0.19     |
| 50-59           | 2001-2016 | 3.64 (2.60 to 4.70)   | <0.001   |           |                       |          | 3.64 (2.60 to 4.70)   | <0.001   |
| 60-69           | 2001-2016 | 4.89 (3.99 to 5.79)   | <0.001   |           |                       |          | 4.89 (3.99 to 5.79)   | <0.001   |
| ≥70             | 2001-2016 | 2.66 (2.13 to 3.19)   | <0.001   |           |                       |          | 2.66 (2.13 to 3.19)   | <0.001   |

Abbreviations: APC, annual percentage change; AAPC, average annual percentage change;

\* Rates were calculated as number of deaths per 100 000 person-years and age adjusted to the 2000 US standard population.

† The calendar period of each segment was defined based on the identification of calendar years when a statistically significant change in the APC occurred (ie, the joinpoint).

‡ Statistical significance was determined when the APCs and AAPCs are significantly different from zero at the  $\alpha=0.05$  level

§ Others include Asian/Pacific Islander, American Indian/Alaskan Native, and other.



**Supplementary Table 7. Trends in Anal Cancer and Squamous Cell Carcinoma Incidence-based Mortality Rate\* During 2001-2016 in the US**

| Characteristic                  | Trends†   |                       |          |           |                       |          |                       |          |
|---------------------------------|-----------|-----------------------|----------|-----------|-----------------------|----------|-----------------------|----------|
|                                 | 1         |                       |          | 2         |                       |          | Overall (2001-2016)   |          |
|                                 | Year      | APC (95% CI)          | P Value‡ | Year      | APC (95% CI)          | P Value‡ | AAPC (95% CI)         | P Value‡ |
| Anal Cancer                     | 2001-2016 | 1.78 (0.47 to 3.10)   | 0.01     |           |                       |          | 1.78 (0.47 to 3.10)   | 0.01     |
| SCCA                            | 2001-2016 | 1.91 (0.47 to 3.38)   | 0.01     |           |                       |          | 1.91 (0.47 to 3.38)   | 0.01     |
| SCCA by patient characteristics |           |                       |          |           |                       |          |                       |          |
| Men                             | 2001-2016 | 2.71 (0.30 to 5.18)   | 0.03     |           |                       |          | 2.71 (0.30-5.18)      | 0.03     |
| Women                           | 2001-2016 | 1.28 (-0.57 to 3.17)  | 0.16     |           |                       |          | 1.28 (-0.57 to 3.17)  | 0.16     |
| Race/ethnicity                  |           |                       |          |           |                       |          |                       |          |
| NH White                        | 2001-2016 | 2.07 (0.39 to 3.78)   | 0.02     |           |                       |          | 2.07 (0.39 to 3.78)   | 0.02     |
| NH Black                        | 2001-2016 | 2.15 (-1.44 to 5.88)  | 0.22     |           |                       |          | 2.15 (-1.44 to 5.88)  | 0.22     |
| Hispanic                        | 2001-2016 | 3.20 (-2.30 to 9.02)  | 0.24     |           |                       |          | 3.20 (-2.30 to 9.02)  | 0.24     |
| Others§                         | 2001-2016 | -0.59 (-6.70 to 5.93) | 0.85     |           |                       |          | -0.59 (-6.70 to 5.93) | 0.85     |
| Stage at diagnosis              |           |                       |          |           |                       |          |                       |          |
| Localized                       | 2001-2016 | 2.64 (-1.04 to 6.46)  | 0.15     |           |                       |          | 2.64 (-1.04 to 6.46)  | 0.15     |
| Regional                        | 2001-2007 | 13.35 (0.68 to 27.60) | 0.04     | 2007-2016 | -2.90 (-8.14 to 2.64) | 0.27     | 3.30 (-1.89 to 8.77)  | 0.22     |
| Distant                         | 2001-2016 | 1.62 (-1.23 to 4.54)  | 0.25     |           |                       |          | 1.62 (-1.23 to 4.54)  | 0.25     |
| Unknown                         | 2001-2016 | -0.49 (-4.84 to 4.06) | 0.82     |           |                       |          | -0.49 (-4.84 to 4.06) | 0.82     |
| Age at diagnosis                |           |                       |          |           |                       |          |                       |          |
| <40                             | 2001-2016 | -2.45 (-8.51 to 4.01) | 0.42     |           |                       |          | -2.45 (-8.51 to 4.01) | 0.42     |
| 40-49                           | 2001-2016 | 1.17 (-2.55 to 5.03)  | 0.52     |           |                       |          | 1.17 (-2.55 to 5.03)  | 0.52     |
| 50-59                           | 2001-2016 | 2.89 (-0.55 to 6.46)  | 0.09     |           |                       |          | 2.89 (-0.55 to 6.46)  | 0.09     |
| 60-69                           | 2001-2016 | 4.95 (2.24 to 7.73)   | 0.001    |           |                       |          | 4.95 (2.24 to 7.73)   | 0.001    |
| >70                             | 2001-2016 | 0.90 (-1.56 to 3.43)  | 0.45     |           |                       |          | 0.90 (-1.56 to 3.43)  | 0.45     |

\* Rates were calculated as number of deaths per 100 000 person-years and age adjusted to the 2000 US standard population.

† The calendar period of each segment was defined based on the identification of calendar years when a statistically significant change in the APC occurred (ie, the joinpoint).

‡ Statistical significance was determined when the APCs and AAPCs are significantly different from zero at the  $\alpha=0.05$  level

§ Others include Asian/Pacific Islander, American Indian/Alaskan Native, and other.
